# Supplementary material for: Quantitative analysis of fluorine and chlorine in apatite by femtosecond laser induced breakdown spectroscopy
Source: Royal Society of Chemistry journal article supplement (doi:10.1039/d5ja00404g), 2026-01-01
Supplement: d5ja00404g1.xlsx [file d5ja00404g1.xlsx]

## Sheet: Sheet1
	CaO	FeO	F	Na2O	SiO2	Cl	MnO	SO3	P2O5	Al2O3	MgO	Total
T38-1	52.802	0.218	0.602	0.174	0.001	4.179	0	0.17	40.861	0.149	0	97.96
T38-2	53.168	0.114	0.536	0.16	0	4.224	0	0.095	41.336	0.853	0	99.307
T38-3	53.101	0.142	0.544	0.187	0	4.345	0.057	0.178	42.153	0	0	99.497
T38-4	52.428	0.139	0.644	0.188	0	4.021	0.02	0.068	40.912	1.282	0.011	98.535
T38-5	53.366	0.177	0.565	0.132	0	4.345	0.052	0.108	42.285	0	0	99.811
T38-6	54.028	0.18	0.589	0.166	0	4.311	0	0.09	40.738	0	0	98.881
T38-7	53.607	0.142	0.468	0.214	0	4.387	0	0.173	42.459	0.002	0	100.265
T38-8	53.346	0.123	0.535	0.175	0	4.239	0.023	0.126	41.377	0.288	0	99.05
T38-9	53.748	0.167	0.428	0.124	0	4.283	0.063	0.163	42.426	0.014	0	100.269
T38-10	53.956	0.183	0.564	0.103	0	4.295	0.017	0.171	42.418	0	0	100.501
T50-1	52.388	0.025	3.47	0.293	0.212	0.516	0.159	0.16	41.495	0	0.363	97.504
T50-2	52.42	0.022	3.299	0.296	0.198	0.513	0.049	0.117	41.383	0	0.424	97.216
T50-3	52.369	0.014	3.263	0.285	0.177	0.495	0.003	0.155	41.067	0	0.438	96.78
T50-4	52.725	0.038	3.379	0.326	0.217	0.49	0.04	0.14	40.539	0	0.406	96.766
T50-5	52.47	0.104	3.188	0.295	0.155	0.515	0.006	0.107	41.004	0.001	0.436	96.823
T50-6	52.4	0.09	3.254	0.293	0.208	0.542	0.118	0.158	41.877	0	0.42	97.868
T50-7	52.368	0.11	3.306	0.285	0.275	0.498	0.133	0.135	40.754	0	0.383	96.743
T50-8	52.518	0.096	3.492	0.331	0.185	0.518	0.113	0.137	41.054	0	0.386	97.243
T50-9	53.095	0.107	3.198	0.271	0.222	0.466	0.061	0.132	41.658	0	0.358	98.116
T50-10	52.387	0.041	3.086	0.266	0.207	0.455	0.078	0.196	42.237	0	0.4	97.951
MRC-1	54.832	0	2.448	0.131	0.601	0.683	0.08	0.9	39.537	0.001	0	98.028
MRC-2	54.448	0.053	2.208	0.015	0.591	0.847	0	0.668	40.462	0.007	0	98.178
MRC-3	54.65	0.024	2.491	0.043	0.481	0.728	0.023	0.7	40.553	0	0	98.48
MRC-4	54.923	0.038	2.253	0.027	0.507	0.846	0.017	0.452	40.433	0	0.004	98.36
MRC-5	54.363	0.045	2.32	0	0.374	0.788	0.02	0.535	40.985	0	0	98.275
MRC-6	55.225	0.044	2.217	0.101	0.662	0.916	0	0.663	38.987	0	0	97.675
MRC-7	55.069	0.093	2.303	0.064	0.729	0.886	0.017	0.652	40.228	0.027	0	98.898
MRC-8	56.289	0.043	2.243	0.052	0.768	0.835	0.037	0.75	41.43	0.001	0	101.316
MRC-9	55.966	0.057	2.698	0.064	0.805	0.709	0.02	0.636	40.934	0	0	100.593
MRC-10	55.212	0.058	2.887	0.11	0.858	0.582	0	0.99	40.17	0.002	0	99.522
12248-1	53.868	0.058	2.406	0.11	0.451	0.909	0.111	0.226	39.095	0.03	0	96.046
12248-2	53.414	0.064	2.09	0.219	0.503	0.898	0.078	0.194	39.488	0.015	0	95.881
12248-3	54.345	0.093	2.25	0.182	0.489	1.01	0.091	0.18	40.268	0	0.002	97.735
12248-4	54.566	0.08	2.274	0.164	0.47	0.968	0.095	0.143	39.796	0.012	0	97.393
12248-5	54.223	0.092	2.302	0.239	0.506	0.934	0.106	0.174	39.762	0	0	97.158
12248-6	53.759	0.06	2.174	0.145	0.4	1.013	0.48	0.142	41.388	0	0.017	98.434
12248-7	53.339	0.09	2.138	0.168	0.346	1.014	0.416	0.183	41.147	0	0.025	97.737
12248-8	53.561	0.09	2.209	0.142	0.425	0.972	0.41	0.218	40.212	0	0.001	97.091
12248-9	53.539	0.112	2.278	0.114	0.374	0.957	0.474	0.16	41.46	0	0.051	98.344
12248-10	53.551	0.123	2.121	0.155	0.43	1.005	0.447	0.175	41.307	0.001	0.045	98.24
MC-1	55.551	0.051	3.706	0	0.325	0.017	0.057	0.01	42.68	0.012	0	100.845
MC-2	55.054	0.015	3.72	0.018	0.259	0.01	0	0.012	42.174	0	0	99.694
MC-3	55.821	0.02	3.587	0.012	0.342	0	0.013	0.021	41.853	0	0.006	100.165
MC-4	55.358	0.007	3.361	0.126	0.224	0.021	0.067	0.031	41.715	0	0	99.49
MC-5	55.797	0	3.07564	0.009	0.25	0.012	0	0.014	42.66	0.003	0.015	100.593
MC-6	55.591	0.027	3.136	0.034	0.246	0.003	0.064	0.019	42.653	0.019	0	100.384
MC-7	55.978	0.003	3.337	0	0.25	0.019	0	0.01	41.732	0	0	99.92
MC-8	55.502	0	3.307	0.009	0.3	0.013	0.013	0.049	42.22	0	0.012	100.03
MC-9	55.788	0	3.22	0	0.314	0.009	0	0	42.296	0.014	0	100.283
MC-10	54.619	0.279	3.33	0.034	1.305	0.009	0.08	0.043	41.557	0.249	0.027	100.128
T40-1	54.516	0.006	1.76	0.03	0.094	1.343	0.047	0.135	41.933	0	0	98.82
T40-2	54.009	0.04	2.35	0.079	0.075	1.317	0.087	0.146	41.728	0	0	98.542
T40-3	55.429	0.025	1.841	0.067	0.108	1.396	0.047	0.137	42.302	0	0	100.262
T40-4	54.351	0.08	1.792	0	0.084	1.327	0.074	0.073	40.473	0	0.008	97.208
T40-5	53.946	0.004	1.773	0.06	0.063	1.379	0.12	0.043	42.176	0	0	98.506
T40-6	54.601	0.011	1.753	0.063	0.067	1.39	0.063	0.116	41.649	0	0	98.661
T40-7	55.218	0	1.884	0.03	0.097	1.276	0.033	0.073	41.465	0	0	98.995
T40-8	54.854	0	1.654	0.012	0.08	1.324	0.077	0.09	40.356	0.01	0	97.462
T40-9	55.732	0	1.767	0.061	0.09	1.339	0.127	0.078	41.351	0	0	99.499
T40-10	55.633	0.052	1.871	0.051	0.09	1.331	0.097	0.135	41.81	0	0	99.982
M-1	54.47	0	3.83	0.037	0.9	0.231	0.013	0.72	37.436	0.009	0	95.981
M-2	55.325	0	3.705	0.061	0.827	0.272	0.027	0.822	40.114	0.008	0.007	99.547
M-3	54.633	0.011	3.641	0.046	0.891	0.271	0	0.702	39.329	0	0	97.93
M-4	54.277	0.019	3.663	0.021	0.899	0.233	0.02	0.778	39.28	0.026	0	97.621
M-5	54.738	0	3.795	0.058	0.923	0.248	0	0.77	39.247	0	0	98.125
M-6	54.699	0.025	3.83	0.079	0.914	0.253	0.04	0.775	39.075	0.006	0	98.026
M-7	54.543	0	3.754	0.104	0.941	0.258	0.057	0.835	37.667	0	0.016	96.536
M-8	54.396	0.069	3.777	0.058	0.924	0.265	0.05	0.787	39.711	0.003	0	98.39
M-9	54.791	0.033	3.67	0.058	0.905	0.24	0.013	0.822	39.326	0.005	0.002	98.266
M-10	54.705	0	3.867	0.021	0.912	0.229	0.07	0.759	39.347	0.002	0	98.232
D-1	54.247	0	3.037	0.128	0.425	0.438	0.04	0.296	41.506	0	0.027	98.766
D-2	53.529	0.044	3.121	0.112	0.438	0.451	0.06	0.36	40.692	0	0	97.391
D-3	54.049	0	3.049	0.182	0.404	0.443	0	0.332	40.321	0.006	0	97.402
D-4	54.39	0	3.129	0.133	0.43	0.44	0.066	0.305	41.402	0	0.006	98.885
D-5	54.061	0.003	3.04	0.14	0.437	0.451	0	0.252	41.293	0	0.004	98.299
D-6	54.209	0.044	3.095	0.141	0.4	0.481	0	0.287	40.91	0	0.013	98.168
D-7	54.636	0.003	3.108	0.181	0.395	0.455	0.009	0.297	40.652	0	0.009	98.333
D-8	54.098	0.068	3.082	0.135	0.444	0.431	0	0.315	41.658	0.007	0.004	98.847
D-9	54.058	0	3.113	0.13	0.4	0.469	0.003	0.29	41.165	0	0.003	98.214
D-10	54.156	0.011	3.101	0.194	0.444	0.456	0.086	0.219	41.463	0.018	0	98.739
MZTH-1	54.182	0.033	3.435	0.174	0.041	0.011	0.033	0.195	41.518	0	0.001	98.175
MZTH-2	54.203	0	3.521	0.174	0.068	0.006	0.037	0.284	41.138	0.001	0.021	97.969
MZTH-3	54.575	0.04	3.418	0.284	0.051	0.019	0	0.252	41.513	0.004	0.005	98.718
MZTH-4	55.05	0.029	3.647	0.144	0.054	0	0.027	0.236	40.82	0	0.006	98.477
MZTH-5	55.51	0.048	3.384	0.135	0.055	0.004	0.064	0.147	41.293	0.022	0	99.236
MZTH-6	55.19	0	3.829	0.168	0.059	0	0	0.195	41.439	0.007	0.005	99.28
MZTH-7	54.765	0.006	3.705	0.217	0.049	0.024	0	0.153	41.191	0.03	0	98.575
MZTH-8	54.98	0.021	3.733	0.208	0.08	0.004	0.044	0.203	41.644	0.02	0	99.364
MZTH-9	55.108	0.01	3.748	0.19	0.039	0	0.007	0.209	41.413	0.002	0	99.148
MZTH-10	54.06	0.052	3.555	0.233	0.073	0	0.04	0.216	42.279	0.008	0	99.019

## Sheet: Sheet2
Measurement	Condition		15kV 10n 5um
WDS elements
	Element	X-ray	Crystal	CH	Acc.v	Peak Pos.	(nm)	BG_L	BG_U	(mm)
1	Ca	Ka	PETJ	1	15	107.537	0.33584	5	5
2	Fe	Ka	LIF	1	15	134.555	0.1936	5	5
3	F	Ka	LDE1	2	15	85.712	1.832	6.899	7.115
4	Na	Ka	TAP	2	15	129.57	1.19101	5	5
5	Si	Ka	TAP	2	15	77.203	0.71254	6.5	5
6	Cl	Ka	PETH	3	15	151.446	0.47278	3	3
7	Mn	Ka	LIFH	3	15	146.626	0.21018	5	5
8	S	Ka	PETJ	4	15	172.099	0.53722	5	5
9	P	Ka	PETJ	4	15	197.218	0.6157	5	5
10	Al	Ka	TAP	5	15	90.469	0.83393	5	5
11	Mg	Ka	TAP	5	15	107.48	0.989	5	5
	Element	Peak	Back	Pksk	Gain	High.V	Base.L	Window.W	Mode
1	Ca	20	10.0 (s)	1	32	1728	0.7	0 (V)	Int
2	Fe	20	10.0 (s)	1	16	1732	0.7	9.3 (V)	Dif
3	F	10	5.0 (s)	1	64	1710	3.3	0 (V)	Int
4	Na	20	10.0 (s)	1	32	1686	0.7	9.3 (V)	Dif
5	Si	20	10.0 (s)	1	32	1686	0.7	9.3 (V)	Dif
6	Cl	10	5.0 (s)	1	32	1728	0.7	9.3 (V)	Dif
7	Mn	20	10.0 (s)	1	32	1736	0.7	0 (V)	Int
8	S	20	10.0 (s)	1	32	1724	0.7	0 (V)	Int
9	P	20	10.0 (s)	1	32	1724	0.7	0 (V)	Int
10	Al	20	10.0 (s)	1	32	1698	0.7	9.3 (V)	Dif
11	Mg	10	5.0 (s)	1	32	1698	0.7	9.3 (V)	Dif
Measurement	Order	of	WDS
Order	Channel 1	2	3	4	5
1	Ca_CH1_P	F_CH2_LD	Cl_CH3_P	Mo_CH4_P	Al_CH5_T
2	Fe_CH1_L	Na_CH2_T	Mn_CH3_L	P_CH4_PE	Mg_CH5_T
3	0	Si_CH2_T	0	0	0
Calc.	Elements :	O	(Anion)
Standard Data
	Element	Standard
1	CaO	Apatite
2	FeO	Magnetite
3	F	BaF2
4	Na2O	Albite
5	SiO2	Cr-Diopside
6	Cl	Tugtupite-1
7	MnO	Rhodonite
8	SO3	Pyrite-1
9	P2O5	Apatite
10	Al2O3	Almandine
11	MgO	Olivine
