# Supplementary material for: Quantitative analysis of fluorine and chlorine in apatite by femtosecond laser induced breakdown spectroscopy
Source: Royal Society of Chemistry journal article supplement (doi:10.1039/d5ja00404g), 2026-01-01
Supplement: d5ja00404g2.xlsx [file d5ja00404g2.xlsx]

## Sheet: Sheet1
Sample name	Predicted value ( wt% )	Sample name	Predicted value ( wt% )		Sample name	Predicted value ( wt% )	Sample name	Predicted value ( wt% )	Sample name	Predicted value ( wt% )	Sample name	Predicted value ( wt% )
Morooco-1	0.79241	TUBAF#50-1	0.510364		TUBAF#38-1	4.27181	TUBAF#40-1	1.35955	MGMH#128441A-1	0.911385	Durango-1	0.541205
Morooco-2	0.658191	TUBAF#50-2	0.481639		TUBAF#38-2	4.26823	TUBAF#40-2	1.37141	MGMH#128441A-2	0.955518	Durango-2	0.393511
Morooco-3	0.745298	TUBAF#50-3	0.475119		TUBAF#38-3	4.38589	TUBAF#40-3	1.3755	MGMH#128441A-3	0.987884	Durango-3	0.468149
Morooco-4	0.861845	TUBAF#50-4	0.481581		TUBAF#38-4	4.17099	TUBAF#40-4	1.31358	MGMH#128441A-4	0.973186	Durango-4	0.514361
Morooco-5	0.831359	TUBAF#50-5	0.483544		TUBAF#38-5	4.12487	TUBAF#40-5	1.34216	MGMH#128441A-5	0.980718	Durango-5	0.393823
Morooco-6	0.767559	TUBAF#50-6	0.464495		TUBAF#38-6	4.11546	TUBAF#40-6	1.23439	MGMH#128441A-6	0.987135	Durango-6	0.551081
Morooco-7	0.738358	TUBAF#50-7	0.502219		TUBAF#38-7	4.1242	TUBAF#40-7	1.42889	MGMH#128441A-7	0.973198	Durango-7	0.42945
Morooco-8	0.756581	TUBAF#50-8	0.554754		TUBAF#38-8	4.21674	TUBAF#40-8	1.26682	MGMH#128441A-8	0.965966	Durango-8	0.410016
Morooco-9	0.854532	TUBAF#50-9	0.503506		TUBAF#38-9	4.33624	TUBAF#40-9	1.26683	MGMH#128441A-9	0.94881	Durango-9	0.466663
Morooco-10	0.772089	TUBAF#50-10	0.583602		TUBAF#38-10	4.39762	TUBAF#40-10	1.35454	MGMH#128441A-10	0.954146	Durango-10	0.473421
Morooco-11	0.795143	TUBAF#50-11	0.433362		TUBAF#38-11	4.38008	TUBAF#40-11	1.2568	MGMH#128441A-11	0.952161	Durango-11	0.557539
Morooco-12	0.746023	TUBAF#50-12	0.492479		TUBAF#38-12	4.10275	TUBAF#40-12	1.39754	MGMH#128441A-12	0.994155	Durango-12	0.422714
Morooco-13	0.840743	TUBAF#50-13	0.489401		TUBAF#38-13	4.27399	TUBAF#40-13	1.34163	MGMH#128441A-13	1.00819	Durango-13	0.366567
Morooco-14	0.782174	TUBAF#50-14	0.455719		TUBAF#38-14	4.2368	TUBAF#40-14	1.343	MGMH#128441A-14	0.943591	Durango-14	0.556874
Morooco-15	0.740016	TUBAF#50-15	0.530946		TUBAF#38-15	4.29617	TUBAF#40-15	1.38838	MGMH#128441A-15	0.952021	Durango-15	0.413466
Morooco-16	0.703902	TUBAF#50-16	0.459085		TUBAF#38-16	4.22263	TUBAF#40-16	1.38641	MGMH#128441A-16	0.906979	Durango-16	0.45546
Morooco-17	0.665317	TUBAF#50-17	0.486205		TUBAF#38-17	4.24195	TUBAF#40-17	1.33099	MGMH#128441A-17	0.861914	Durango-17	0.399745
Morooco-18	0.69913	TUBAF#50-18	0.528118		TUBAF#38-18	4.25101	TUBAF#40-18	1.1122	MGMH#128441A-18	1.01473	Durango-18	0.535669
Morooco-19	0.671129	TUBAF#50-19	0.413122		TUBAF#38-19	4.37822	TUBAF#40-19	1.34505	MGMH#128441A-19	0.935526	Durango-19	0.446284
Morooco-20	0.765515	TUBAF#50-20	0.45046		TUBAF#38-20	4.19217	TUBAF#40-20	1.35148	MGMH#128441A-20	1.04423	Durango-20	0.444875
Morooco-21	0.722082	TUBAF#50-21	0.453821		TUBAF#38-21	4.3379	TUBAF#40-21	1.14677	MGMH#128441A-21	0.938565	Durango-21	0.532659
Morooco-22	0.613976	TUBAF#50-22	0.567507		TUBAF#38-22	4.12301	TUBAF#40-22	1.37034	MGMH#128441A-22	0.867441	Durango-22	0.533262
Morooco-23	0.836519	TUBAF#50-23	0.527664		TUBAF#38-23	4.28008	TUBAF#40-23	1.2684	MGMH#128441A-23	0.916899	Durango-23	0.591145
Morooco-24	0.761806	TUBAF#50-24	0.48739		TUBAF#38-24	4.1062	TUBAF#40-24	1.27147	MGMH#128441A-24	0.960529	Durango-24	0.595895
Morooco-25	0.744175	TUBAF#50-25	0.577117		TUBAF#38-25	4.27747	TUBAF#40-25	1.37708	MGMH#128441A-25	0.942951	Durango-25	0.567034
Morooco-26	0.659328	TUBAF#50-26	0.492893		TUBAF#38-26	4.39254	TUBAF#40-26	1.2407	MGMH#128441A-26	0.994111	Durango-26	0.494777
Morooco-27	0.699877	TUBAF#50-27	0.487759		TUBAF#38-27	4.37331	TUBAF#40-27	1.33674	MGMH#128441A-27	0.995452	Durango-27	0.498325
Morooco-28	0.803904	TUBAF#50-28	0.461001		TUBAF#38-28	4.18651	TUBAF#40-28	1.23706	MGMH#128441A-28	0.875348	Durango-28	0.484084
Morooco-29	0.786541	TUBAF#50-29	0.487415		TUBAF#38-29	4.3434	TUBAF#40-29	1.2343	MGMH#128441A-29	1.09302	Durango-29	0.458383
Morooco-30	0.648509	TUBAF#50-30	0.545118		TUBAF#38-30	4.12282	TUBAF#40-30	1.30932	MGMH#128441A-30	1.02986	Durango-30	0.451599
Morooco-31	0.681229	TUBAF#50-31	0.449069		TUBAF#38-31	4.15491	TUBAF#40-31	1.32726	MGMH#128441A-31	1.0815	Durango-31	0.512951
Morooco-32	0.880274	TUBAF#50-32	0.551848		TUBAF#38-32	4.18734	TUBAF#40-32	1.40875	MGMH#128441A-32	1.05155	Durango-32	0.458334
Morooco-33	0.734618	TUBAF#50-33	0.53188		TUBAF#38-33	4.22107	TUBAF#40-33	1.3243	MGMH#128441A-33	1.0078	Durango-33	0.448056
Morooco-34	0.590259	TUBAF#50-34	0.549984		TUBAF#38-34	4.24033	TUBAF#40-34	1.40478	MGMH#128441A-34	0.989411	Durango-34	0.452119
Morooco-35	0.661815	TUBAF#50-35	0.51736		TUBAF#38-35	4.12494	TUBAF#40-35	1.28638	MGMH#128441A-35	0.973525	Durango-35	0.584084
Morooco-36	0.642837	TUBAF#50-36	0.550165		TUBAF#38-36	4.24338	TUBAF#40-36	1.38461	MGMH#128441A-36	0.928415	Durango-36	0.558383
Morooco-37	0.63387	TUBAF#50-37	0.500884		TUBAF#38-37	4.20662	TUBAF#40-37	1.22339	MGMH#128441A-37	0.904725	Durango-37	0.370914
Morooco-38	0.711521	TUBAF#50-38	0.572776		TUBAF#38-38	4.32872	TUBAF#40-38	1.32932	MGMH#128441A-38	0.985207	Durango-38	0.438329
Morooco-39	0.854556	TUBAF#50-39	0.577157		TUBAF#38-39	4.27643	TUBAF#40-39	1.32428	MGMH#128441A-39	0.907368	Durango-39	0.59579
Morooco-40	0.719992	TUBAF#50-40	0.471324		TUBAF#38-40	4.35895	TUBAF#40-40	1.3399	MGMH#128441A-40	0.932628	Durango-40	0.50423
Morooco-41	0.641908	TUBAF#50-41	0.557414		TUBAF#38-41	4.36914	TUBAF#40-41	1.30667	MGMH#128441A-41	1.05843	Durango-41	0.592219
Morooco-42	0.625993	TUBAF#50-42	0.490485		TUBAF#38-42	4.25633	TUBAF#40-42	1.32212	MGMH#128441A-42	0.970683	Durango-42	0.568048
Morooco-43	0.647101	TUBAF#50-43	0.452768		TUBAF#38-43	4.33467	TUBAF#40-43	1.30086	MGMH#128441A-43	0.944006	Durango-43	0.489431
Morooco-44	0.65584	TUBAF#50-44	0.516654		TUBAF#38-44	4.37532	TUBAF#40-44	1.3556	MGMH#128441A-44	1.00539	Durango-44	0.517342
Morooco-45	0.656021	TUBAF#50-45	0.464434		TUBAF#38-45	4.35688	TUBAF#40-45	1.3013	MGMH#128441A-45	0.888014	Durango-45	0.39233
Morooco-46	0.733261	TUBAF#50-46	0.525416		TUBAF#38-46	4.1661	TUBAF#40-46	1.30675	MGMH#128441A-46	0.933847	Durango-46	0.490442
Morooco-47	0.743145	TUBAF#50-47	0.614565		TUBAF#38-47	4.34344	TUBAF#40-47	1.26251	MGMH#128441A-47	0.901497	Durango-47	0.591004
Morooco-48	0.630703	TUBAF#50-48	0.49936		TUBAF#38-48	4.25291	TUBAF#40-48	1.227	MGMH#128441A-48	0.88508	Durango-48	0.584974
Morooco-49	0.722334	TUBAF#50-49	0.483607		TUBAF#38-49	4.25165	TUBAF#40-49	1.41669	MGMH#128441A-49	0.931376	Durango-49	0.536247
Morooco-50	0.689974	TUBAF#50-50	0.465716		TUBAF#38-50	4.28396	TUBAF#40-50	1.31976	MGMH#128441A-50	0.888149	Durango-50	0.425808
Morooco-51	0.849366	TUBAF#50-51	0.447349
Morooco-52	0.732285	TUBAF#50-52	0.444771
Morooco-53	0.759909	TUBAF#50-53	0.466417
Morooco-54	0.786667	TUBAF#50-54	0.534483
Morooco-55	0.798732	TUBAF#50-55	0.496362
Morooco-56	0.89026	TUBAF#50-56	0.472064
Morooco-57	0.720258	TUBAF#50-57	0.575724
Morooco-58	0.716775	TUBAF#50-58	0.447476
Morooco-59	0.696328	TUBAF#50-59	0.566472
Morooco-60	0.713767	TUBAF#50-60	0.491147
Morooco-61	0.781079	TUBAF#50-61	0.44728
Morooco-62	0.81238	TUBAF#50-62	0.449333
Morooco-63	0.717643	TUBAF#50-63	0.513075
Morooco-64	0.846936	TUBAF#50-64	0.587524
Morooco-65	0.704122	TUBAF#50-65	0.536841
Morooco-66	0.673003	TUBAF#50-66	0.432736
Morooco-67	0.796659	TUBAF#50-67	0.5688
Morooco-68	0.725745	TUBAF#50-68	0.49735
Morooco-69	0.70567	TUBAF#50-69	0.46048
Morooco-70	0.76934	TUBAF#50-70	0.50869
Morooco-71	0.722386	TUBAF#50-71	0.437106
Morooco-72	0.800395	TUBAF#50-72	0.474058
Morooco-73	0.711375	TUBAF#50-73	0.497018
Morooco-74	0.745843	TUBAF#50-74	0.488529
Morooco-75	0.702461	TUBAF#50-75	0.520322
Morooco-76	0.682128	TUBAF#50-76	0.524061
Morooco-77	0.659494	TUBAF#50-77	0.501629
Morooco-78	0.679764	TUBAF#50-78	0.553021
Morooco-79	0.627658	TUBAF#50-79	0.505357
Morooco-80	0.72758	TUBAF#50-80	0.514061
