# Supplementary material for: Quantitative analysis of fluorine and chlorine in apatite by femtosecond laser induced breakdown spectroscopy
Source: Royal Society of Chemistry journal article supplement (doi:10.1039/d5ja00404g), 2026-01-01
Supplement: d5ja00404g3.xlsx [file d5ja00404g3.xlsx]

## Sheet: Sheet1
Sample name	Predicted value ( wt% )	Sample name	Predicted value ( wt% )	Sample name	Predicted value ( wt% )	Sample name	Predicted value ( wt% )	Sample name	Predicted value ( wt% )		Sample name	Predicted value ( wt% )	Sample name	Predicted value ( wt% )	Sample name	Predicted value ( wt% )	Sample name	Predicted value ( wt% )
MRC-1	2.44283	Durango-1	3.15573	TUBAF#50-1	3.23313	McClure-1	3.23885	Apatite MZ-TH -1	3.58559		TUBAF#38-1	0.546299	TUBAF#40-1	1.81602	MGMH#128441A-1	2.32456	MAD-1	3.67607
MRC-2	2.36063	Durango-2	3.05576	TUBAF#50-2	3.18607	McClure-2	3.29808	Apatite MZ-TH -2	3.52421		TUBAF#38-2	0.542777	TUBAF#40-2	1.80675	MGMH#128441A-2	2.38532	MAD-2	3.63234
MRC-3	2.40681	Durango-3	3.0186	TUBAF#50-3	3.28653	McClure-3	3.37703	Apatite MZ-TH -3	3.59576		TUBAF#38-3	0.492635	TUBAF#40-3	1.65488	MGMH#128441A-3	2.37843	MAD-3	3.63736
MRC-4	2.47602	Durango-4	3.09313	TUBAF#50-4	3.20929	McClure-4	3.41208	Apatite MZ-TH -4	3.5302		TUBAF#38-4	0.528227	TUBAF#40-4	1.76358	MGMH#128441A-4	2.37346	MAD-4	3.66239
MRC-5	2.37756	Durango-5	3.12686	TUBAF#50-5	3.18386	McClure-5	3.34875	Apatite MZ-TH -5	3.55321		TUBAF#38-5	0.494158	TUBAF#40-5	1.71022	MGMH#128441A-5	2.2899	MAD-5	3.64272
MRC-6	2.40014	Durango-6	3.14012	TUBAF#50-6	3.19923	McClure-6	3.38728	Apatite MZ-TH -6	3.51594		TUBAF#38-6	0.474556	TUBAF#40-6	1.79247	MGMH#128441A-6	2.28394	MAD-6	3.5587
MRC-7	2.42657	Durango-7	3.10188	TUBAF#50-7	3.29492	McClure-7	3.36756	Apatite MZ-TH -7	3.65332		TUBAF#38-7	0.505201	TUBAF#40-7	1.7727	MGMH#128441A-7	2.39617	MAD-7	3.57658
MRC-8	2.35659	Durango-8	3.16496	TUBAF#50-8	3.31621	McClure-8	3.22817	Apatite MZ-TH -8	3.56873		TUBAF#38-8	0.517791	TUBAF#40-8	1.71122	MGMH#128441A-8	2.31155	MAD-8	3.70522
MRC-9	2.42933	Durango-9	3.10065	TUBAF#50-9	3.34679	McClure-9	3.24068	Apatite MZ-TH -9	3.71238		TUBAF#38-9	0.485453	TUBAF#40-9	1.83397	MGMH#128441A-9	2.27072	MAD-9	3.62999
MRC-10	2.41328	Durango-10	3.15202	TUBAF#50-10	3.32842	McClure-10	3.23335	Apatite MZ-TH -10	3.64808		TUBAF#38-10	0.493774	TUBAF#40-10	1.76818	MGMH#128441A-10	2.35149	MAD-10	3.63271
MRC-11	2.55253	Durango-11	3.11336	TUBAF#50-11	3.26528	McClure-11	3.29775	Apatite MZ-TH -11	3.603		TUBAF#38-11	0.500163	TUBAF#40-11	1.78324	MGMH#128441A-11	2.30179	MAD-11	3.605
MRC-12	2.43031	Durango-12	3.07484	TUBAF#50-12	3.36515	McClure-12	3.18087	Apatite MZ-TH -12	3.65284		TUBAF#38-12	0.523507	TUBAF#40-12	1.79326	MGMH#128441A-12	2.3329	MAD-12	3.69955
MRC-13	2.53723	Durango-13	3.10065	TUBAF#50-13	3.24356	McClure-13	3.27726	Apatite MZ-TH -13	3.63207		TUBAF#38-13	0.505273	TUBAF#40-13	1.8187	MGMH#128441A-13	2.31237	MAD-13	3.41511
MRC-14	2.51727	Durango-14	3.07492	TUBAF#50-14	3.48341	McClure-14	3.35987	Apatite MZ-TH -14	3.58437		TUBAF#38-14	0.525213	TUBAF#40-14	1.66916	MGMH#128441A-14	2.3668	MAD-14	3.61382
MRC-15	2.53766	Durango-15	3.07931	TUBAF#50-15	3.46559	McClure-15	3.37702	Apatite MZ-TH -15	3.58601		TUBAF#38-15	0.495513	TUBAF#40-15	1.79945	MGMH#128441A-15	2.5006	MAD-15	3.5795
MRC-16	2.53363	Durango-16	3.05764	TUBAF#50-16	3.23476	McClure-16	3.34785	Apatite MZ-TH -16	3.59492		TUBAF#38-16	0.525181	TUBAF#40-16	1.69878	MGMH#128441A-16	2.53109	MAD-16	3.75137
MRC-17	2.46585	Durango-17	3.0357	TUBAF#50-17	3.17917	McClure-17	3.4314	Apatite MZ-TH -17	3.68054		TUBAF#38-17	0.47751	TUBAF#40-17	1.73372	MGMH#128441A-17	2.47043	MAD-17	3.78127
MRC-18	2.54167	Durango-18	3.16538	TUBAF#50-18	3.28174	McClure-18	3.39863	Apatite MZ-TH -18	3.56003		TUBAF#38-18	0.500333	TUBAF#40-18	1.77489	MGMH#128441A-18	2.40986	MAD-18	3.56745
MRC-19	2.52115	Durango-19	3.13153	TUBAF#50-19	3.38058	McClure-19	3.4696	Apatite MZ-TH -19	3.65651		TUBAF#38-19	0.504496	TUBAF#40-19	1.77805	MGMH#128441A-19	2.30318	MAD-19	3.58547
MRC-20	2.51886	Durango-20	3.16913	TUBAF#50-20	3.41199	McClure-20	3.37013	Apatite MZ-TH -20	3.63433		TUBAF#38-20	0.483513	TUBAF#40-20	1.71555	MGMH#128441A-20	2.32456	MAD-20	3.62636
MRC-21	2.46582	Durango-21	3.11062	TUBAF#50-21	3.32277	McClure-21	3.35994	Apatite MZ-TH -21	3.63517		TUBAF#38-21	0.529434	TUBAF#40-21	1.74833	MGMH#128441A-21	2.28669	MAD-21	3.54923
MRC-22	2.40103	Durango-22	3.20129	TUBAF#50-22	3.27958	McClure-22	3.23649	Apatite MZ-TH -22	3.61043		TUBAF#38-22	0.467321	TUBAF#40-22	1.65804	MGMH#128441A-22	2.34374	MAD-22	3.51604
MRC-23	2.35138	Durango-23	3.04343	TUBAF#50-23	3.3011	McClure-23	3.26476	Apatite MZ-TH -23	3.61666		TUBAF#38-23	0.512356	TUBAF#40-23	1.74091	MGMH#128441A-23	2.40344	MAD-23	3.5313
MRC-24	2.42658	Durango-24	3.08896	TUBAF#50-24	3.248	McClure-24	3.19657	Apatite MZ-TH -24	3.54472		TUBAF#38-24	0.492738	TUBAF#40-24	1.62386	MGMH#128441A-24	2.42382	MAD-24	3.65297
MRC-25	2.41903	Durango-25	3.07555	TUBAF#50-25	3.27983	McClure-25	3.35304	Apatite MZ-TH -25	3.63992		TUBAF#38-25	0.467189	TUBAF#40-25	1.70549	MGMH#128441A-25	2.39021	MAD-25	3.60248
MRC-26	2.53836	Durango-26	3.06867	TUBAF#50-26	3.31758	McClure-26	3.30763	Apatite MZ-TH -26	3.61587		TUBAF#38-26	0.494492	TUBAF#40-26	1.7638	MGMH#128441A-26	2.21696	MAD-26	3.65847
MRC-27	2.4085	Durango-27	3.01189	TUBAF#50-27	3.25921	McClure-27	3.37589	Apatite MZ-TH -27	3.48823		TUBAF#38-27	0.521296	TUBAF#40-27	1.77021	MGMH#128441A-27	2.21559	MAD-27	3.62942
MRC-28	2.34894	Durango-28	3.02548	TUBAF#50-28	3.27671	McClure-28	3.26092	Apatite MZ-TH -28	3.49762		TUBAF#38-28	0.509978	TUBAF#40-28	1.65294	MGMH#128441A-28	2.22802	MAD-28	3.63512
MRC-29	2.45566	Durango-29	3.01277	TUBAF#50-29	3.24579	McClure-29	3.24455	Apatite MZ-TH -29	3.44903		TUBAF#38-29	0.505073	TUBAF#40-29	1.76329	MGMH#128441A-29	2.19367	MAD-29	3.60257
MRC-30	2.41549	Durango-30	3.14031	TUBAF#50-30	3.16303	McClure-30	3.34329	Apatite MZ-TH -30	3.48463		TUBAF#38-30	0.502698	TUBAF#40-30	1.80452	MGMH#128441A-30	2.19254	MAD-30	3.7114
MRC-31	2.56059	Durango-31	3.12006	TUBAF#50-31	3.25525	McClure-31	3.32546	Apatite MZ-TH -31	3.49136		TUBAF#38-31	0.510327	TUBAF#40-31	1.82362	MGMH#128441A-31	2.20424	MAD-31	3.69799
MRC-32	2.43143	Durango-32	3.10732	TUBAF#50-32	3.30651	McClure-32	3.24469	Apatite MZ-TH -32	3.36812		TUBAF#38-32	0.501843	TUBAF#40-32	1.81639	MGMH#128441A-32	2.15721	MAD-32	3.68015
MRC-33	2.45397	Durango-33	3.13292	TUBAF#50-33	3.31432	McClure-33	3.31054	Apatite MZ-TH -33	3.52013		TUBAF#38-33	0.502554	TUBAF#40-33	1.84322	MGMH#128441A-33	2.32719	MAD-33	3.70465
MRC-34	2.40798	Durango-34	3.0912	TUBAF#50-34	3.27353	McClure-34	3.34688	Apatite MZ-TH -34	3.46089		TUBAF#38-34	0.502275	TUBAF#40-34	1.83047	MGMH#128441A-34	2.37345	MAD-34	3.71327
MRC-35	2.4303	Durango-35	3.06618	TUBAF#50-35	3.28704	McClure-35	3.38233	Apatite MZ-TH -35	3.42371		TUBAF#38-35	0.504905	TUBAF#40-35	1.84477	MGMH#128441A-35	2.31923	MAD-35	3.75861
MRC-36	2.36017	Durango-36	3.0505	TUBAF#50-36	3.2975	McClure-36	3.41568	Apatite MZ-TH -36	3.74365		TUBAF#38-36	0.520683	TUBAF#40-36	1.72262	MGMH#128441A-36	2.29139	MAD-36	3.70322
MRC-37	2.6286	Durango-37	3.03655	TUBAF#50-37	3.1797	McClure-37	3.4726	Apatite MZ-TH -37	3.57149		TUBAF#38-37	0.511022	TUBAF#40-37	1.77912	MGMH#128441A-37	2.32956	MAD-37	3.84055
MRC-38	2.58809	Durango-38	3.0553	TUBAF#50-38	3.15219	McClure-38	3.35518	Apatite MZ-TH -38	3.65986		TUBAF#38-38	0.508381	TUBAF#40-38	1.74969	MGMH#128441A-38	2.34182	MAD-38	3.77853
MRC-39	2.4581	Durango-39	3.0372	TUBAF#50-39	3.33478	McClure-39	3.2808	Apatite MZ-TH -39	3.52743		TUBAF#38-39	0.555646	TUBAF#40-39	1.76294	MGMH#128441A-39	2.2304	MAD-39	3.76925
MRC-40	2.451	Durango-40	3.01153	TUBAF#50-40	3.2599	McClure-40	3.33179	Apatite MZ-TH -40	3.56807		TUBAF#38-40	0.56461	TUBAF#40-40	1.7469	MGMH#128441A-40	2.311	MAD-40	3.82641
MRC-41	2.39115	Durango-41	3.17199	TUBAF#50-41	3.25481	McClure-41	3.53212	Apatite MZ-TH -41	3.57088		TUBAF#38-41	0.557206	TUBAF#40-41	1.82715	MGMH#128441A-41	2.30264	MAD-41	3.83811
MRC-42	2.39825	Durango-42	3.15838	TUBAF#50-42	3.35227	McClure-42	3.41438	Apatite MZ-TH -42	3.71209		TUBAF#38-42	0.566251	TUBAF#40-42	1.88799	MGMH#128441A-42	2.35062	MAD-42	3.71162
MRC-43	2.3768	Durango-43	3.12686	TUBAF#50-43	3.30859	McClure-43	3.5326	Apatite MZ-TH -43	3.5445		TUBAF#38-43	0.556175	TUBAF#40-43	1.89791	MGMH#128441A-43	2.34872	MAD-43	3.7509
MRC-44	2.42296	Durango-44	3.21023	TUBAF#50-44	3.28284	McClure-44	3.43987	Apatite MZ-TH -44	3.64287		TUBAF#38-44	0.506182	TUBAF#40-44	1.82923	MGMH#128441A-44	2.33755	MAD-44	3.70815
MRC-45	2.50366	Durango-45	3.1643	TUBAF#50-45	3.23159	McClure-45	3.34402	Apatite MZ-TH -45	3.63268		TUBAF#38-45	0.539554	TUBAF#40-45	1.79773	MGMH#128441A-45	2.3262	MAD-45	3.67173
MRC-46	2.61158	Durango-46	3.08687	TUBAF#50-46	3.34557	McClure-46	3.24353	Apatite MZ-TH -46	3.50762		TUBAF#38-46	0.550841	TUBAF#40-46	1.89451	MGMH#128441A-46	2.24105	MAD-46	3.64117
MRC-47	2.55976	Durango-47	3.12872	TUBAF#50-47	3.41911	McClure-47	3.21752	Apatite MZ-TH -47	3.57838		TUBAF#38-47	0.510203	TUBAF#40-47	1.79846	MGMH#128441A-47	2.18509	MAD-47	3.62521
MRC-48	2.55399	Durango-48	3.05068	TUBAF#50-48	3.33748	McClure-48	3.33882	Apatite MZ-TH -48	3.60008		TUBAF#38-48	0.524081	TUBAF#40-48	1.86021	MGMH#128441A-48	2.2338	MAD-48	3.66028
MRC-49	2.49574	Durango-49	3.247	TUBAF#50-49	3.39604	McClure-49	3.3136	Apatite MZ-TH -49	3.50667		TUBAF#38-49	0.530061	TUBAF#40-49	1.79638	MGMH#128441A-49	2.31795	MAD-49	3.66909
MRC-50	2.49039	Durango-50	3.07585	TUBAF#50-50	3.32381	McClure-50	3.26488	Apatite MZ-TH -50	3.6475		TUBAF#38-50	0.522335	TUBAF#40-50	1.89277	MGMH#128441A-50	2.23694	MAD-50	3.65602
MRC-51	2.44573	Durango-51	3.06884	TUBAF#50-51	3.15255	McClure-51	3.34396	Apatite MZ-TH -51	3.67854
MRC-52	2.42729	Durango-52	3.11203	TUBAF#50-52	3.21441	McClure-52	3.24773	Apatite MZ-TH -52	3.56801
MRC-53	2.51408	Durango-53	3.08896	TUBAF#50-53	3.21792	McClure-53	3.39522	Apatite MZ-TH -53	3.58592
MRC-54	2.5198	Durango-54	3.01775	TUBAF#50-54	3.2408	McClure-54	3.34375	Apatite MZ-TH -54	3.56393
MRC-55	2.43775	Durango-55	3.19552	TUBAF#50-55	3.1876	McClure-55	3.37805	Apatite MZ-TH -55	3.51585
MRC-56	2.47069	Durango-56	3.1473	TUBAF#50-56	3.22275	McClure-56	3.4179	Apatite MZ-TH -56	3.57942
MRC-57	2.43501	Durango-57	3.07694	TUBAF#50-57	3.18306	McClure-57	3.35544	Apatite MZ-TH -57	3.60651
MRC-58	2.48488	Durango-58	3.01012	TUBAF#50-58	3.23991	McClure-58	3.37123	Apatite MZ-TH -58	3.63958
MRC-59	2.53167	Durango-59	3.0646	TUBAF#50-59	3.2955	McClure-59	3.43772	Apatite MZ-TH -59	3.66007
MRC-60	2.52955	Durango-60	3.21031	TUBAF#50-60	3.33474	McClure-60	3.36939	Apatite MZ-TH -60	3.53628
MRC-61	2.58243	Durango-61	3.16176	TUBAF#50-61	3.17811	McClure-61	3.39515	Apatite MZ-TH -61	3.59541
MRC-62	2.56467	Durango-62	3.10405	TUBAF#50-62	3.21676	McClure-62	3.3338	Apatite MZ-TH -62	3.58087
MRC-63	2.49225	Durango-63	3.1375	TUBAF#50-63	3.1114	McClure-63	3.32905	Apatite MZ-TH -63	3.64676
MRC-64	2.5261	Durango-64	3.10906	TUBAF#50-64	3.2074	McClure-64	3.2467	Apatite MZ-TH -64	3.54408
MRC-65	2.45669	Durango-65	3.16985	TUBAF#50-65	3.24109	McClure-65	3.30105	Apatite MZ-TH -65	3.50174
MRC-66	2.38293	Durango-66	3.03941	TUBAF#50-66	3.0802	McClure-66	3.20636	Apatite MZ-TH -66	3.42473
MRC-67	2.46175	Durango-67	3.12006	TUBAF#50-67	3.2118	McClure-67	3.31561	Apatite MZ-TH -67	3.56285
MRC-68	2.42732	Durango-68	3.12065	TUBAF#50-68	3.31057	McClure-68	3.20058	Apatite MZ-TH -68	3.54678
MRC-69	2.41596	Durango-69	3.0433	TUBAF#50-69	3.23148	McClure-69	3.30129	Apatite MZ-TH -69	3.58087
MRC-70	2.48212	Durango-70	3.15126	TUBAF#50-70	3.27044	McClure-70	3.37143	Apatite MZ-TH -70	3.64676
MRC-71	2.52193	Durango-71	3.19978	TUBAF#50-71	3.13431	McClure-71	3.36852	Apatite MZ-TH -71	3.54408
MRC-72	2.59529	Durango-72	3.14886	TUBAF#50-72	3.42841	McClure-72	3.38749	Apatite MZ-TH -72	3.50174
MRC-73	2.53501	Durango-73	3.19338	TUBAF#50-73	3.41778	McClure-73	3.39671	Apatite MZ-TH -73	3.56285
MRC-74	2.43354	Durango-74	3.18495	TUBAF#50-74	3.25778	McClure-74	3.35014	Apatite MZ-TH -74	3.54678
MRC-75	2.51304	Durango-75	3.09065	TUBAF#50-75	3.215	McClure-75	3.39473	Apatite MZ-TH -75	3.67919
MRC-76	2.51796	Durango-76	3.0962	TUBAF#50-76	3.23931	McClure-76	3.35398	Apatite MZ-TH -76	3.61161
MRC-77	2.49194	Durango-77	3.12718	TUBAF#50-77	3.23066	McClure-77	3.40197	Apatite MZ-TH -77	3.43734
MRC-78	2.50278	Durango-78	3.01023	TUBAF#50-78	3.2576	McClure-78	3.27079	Apatite MZ-TH -78	3.51717
MRC-79	2.5024	Durango-79	3.16464	TUBAF#50-79	3.29871	McClure-79	3.30075	Apatite MZ-TH -79	3.50168
MRC-80	2.47107	Durango-80	3.05171	TUBAF#50-80	3.23323	McClure-80	3.36987	Apatite MZ-TH -80	3.56299
